# Supplementary material for: Highly oxygenated molecules (HOMs) and secondary organic aerosol (SOA) formation from the oxidation of α - and β -phellandrenes by NO 3 radicals
Source: Copernicus journal article supplement (doi:10.5194/acp-25-11003-2025), 2025-09-23
Supplement: Supplementary file 1 [file acp-25-11003-2025-supplement.pdf]

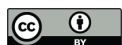

*Supplement of*

## **Highly oxygenated molecules (HOMs) and secondary organic aerosol (SOA) formation from the oxidation of $\alpha$ - and $\beta$ -phellandrenes by $\text{NO}_3$ radicals**

**Sergio Harb et al.**

*Correspondence to:* Sergio Harb ([sergio.harb@ineris.fr](mailto:sergio.harb@ineris.fr)) and Bénédicte Picquet-Varrault ([benedicte.picquet-varrault@lisa.ipsl.fr](mailto:benedicte.picquet-varrault@lisa.ipsl.fr))

The copyright of individual parts of the supplement might differ from the article licence.

## Supporting Information

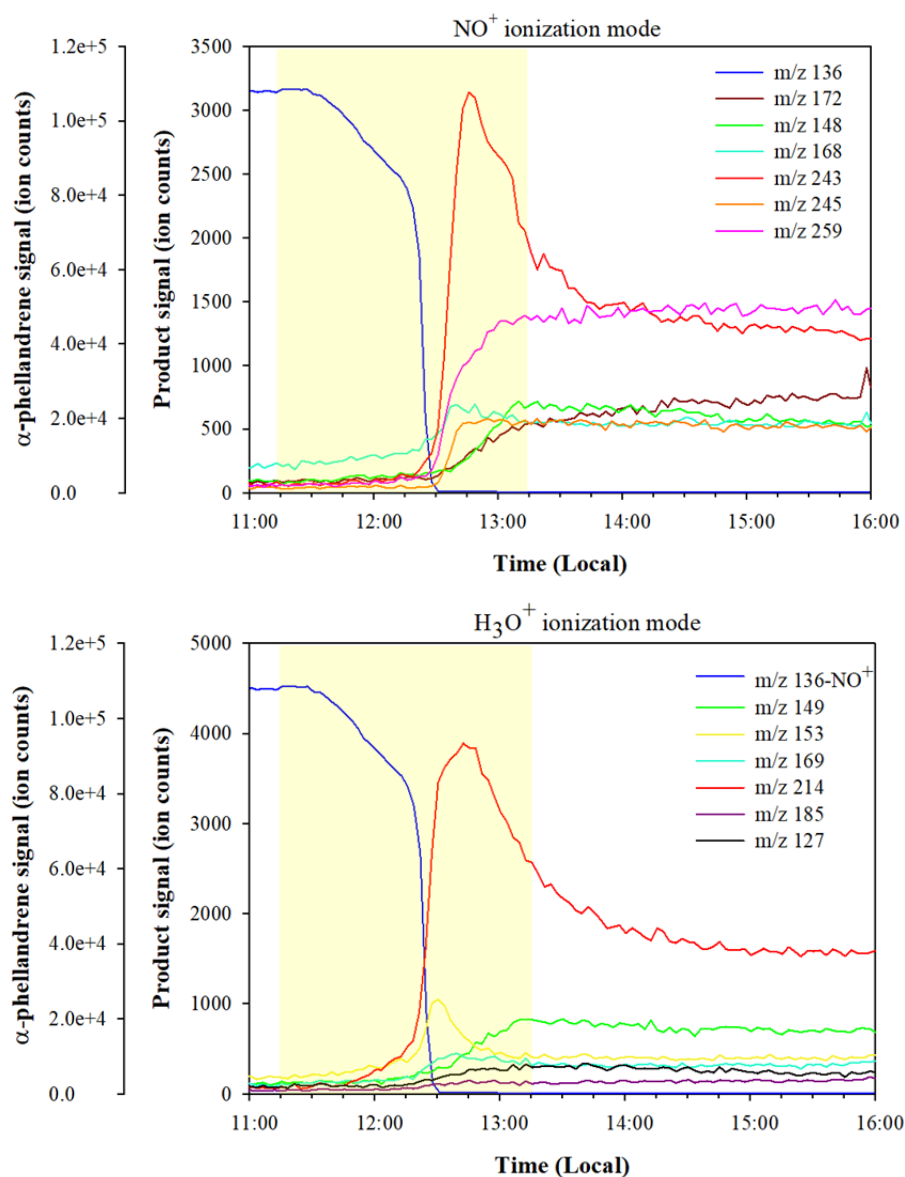

Figure S1: Example of typical time profiles of  $\alpha$ -phellandrene and products detected with PTR-ToF-MS ( $\text{NO}^+$  and  $\text{H}_3\text{O}^+$  ionization modes) for Experiment 7. The  $\text{N}_2\text{O}_5$  injection period is shown by the yellow area.

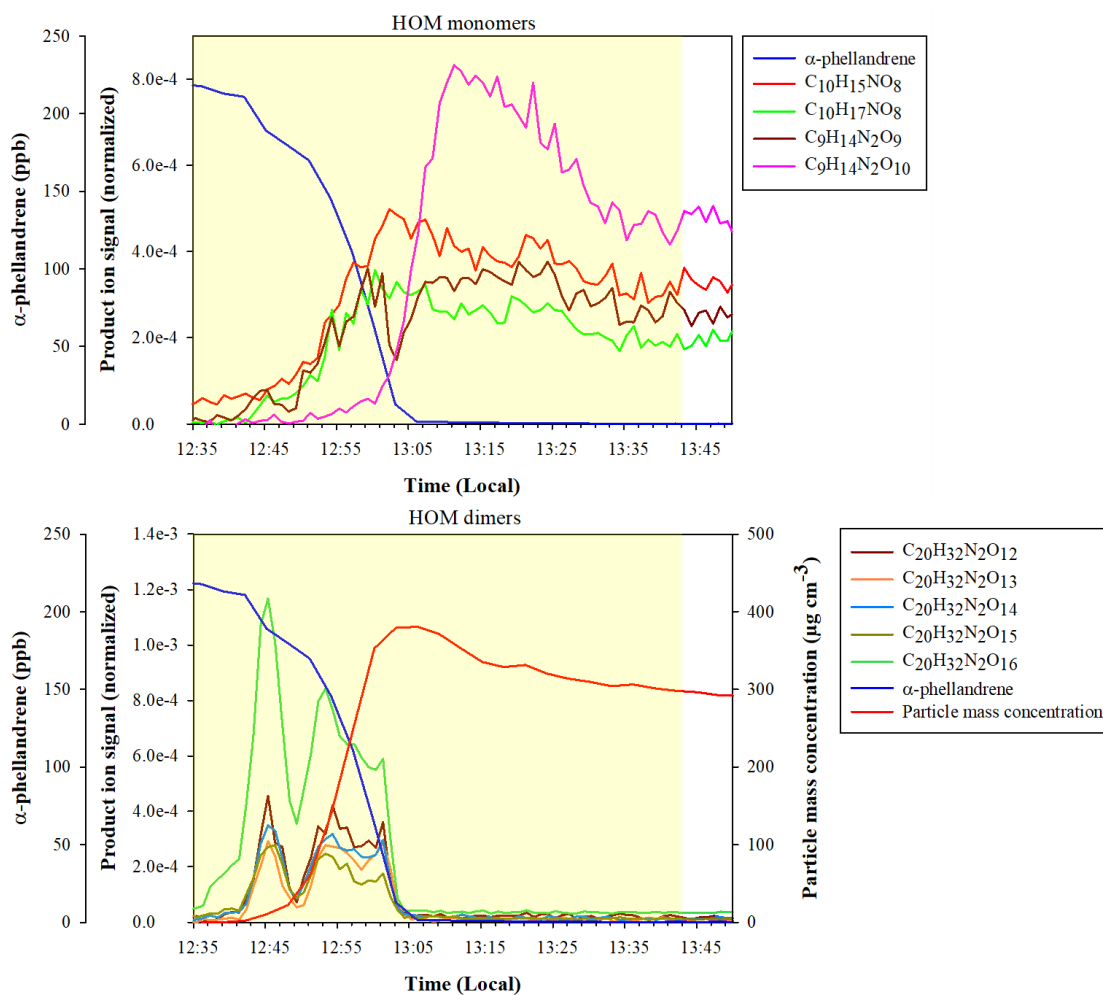

**Figure S2: Time profiles of a selection of gas-phase HOM monomers and dimers produced by the oxidation of  $\alpha$ -phellandrene by  $NO_3$  radical (Experiment 6). The  $N_2O_5$  injection period is shown by the yellow area. Further oxidation of some formed products could occur after complete BVOC consumption, which may explain the observed downward slope in some traces of HOM monomers.**

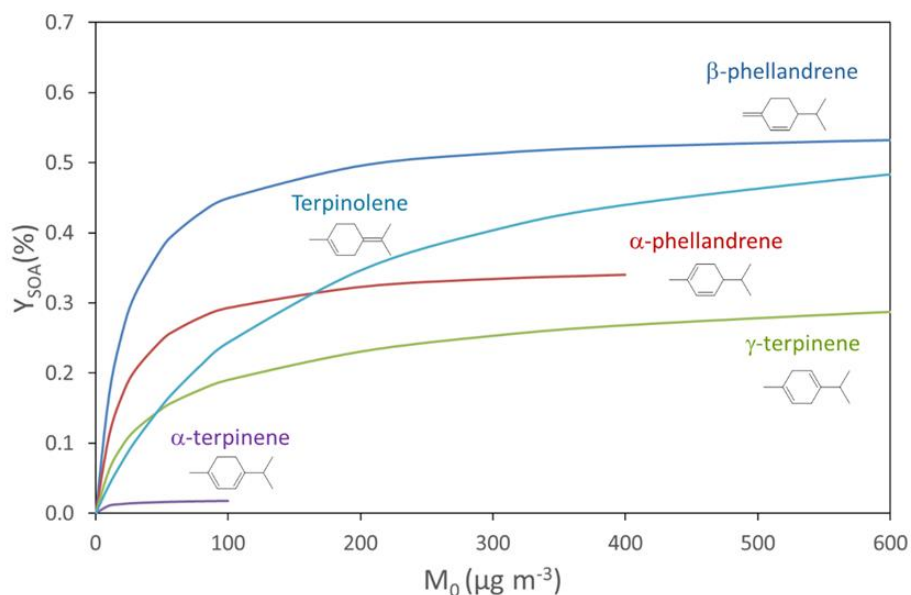

**Figure S3:** Odum parametrization describing the dependence of the SOA yields with the aerosol content (in  $\mu\text{g}/\text{m}^3$ ) for  $\alpha$ - and  $\beta$ -phellandrenes (this study),  $\alpha$ - and  $\gamma$ -terpinenes (Fouqueau et al., 2020) and terpinolene (Fouqueau et al., 2022).

**Table S1:** Products detected by PTR-ToF-MS in  $\text{H}_3\text{O}^+$  and  $\text{NO}^+$  ionization modes for the oxidation by  $\text{NO}_3$  radical of  $\alpha$ - and  $\beta$ -phellandrenes: raw formula, molecular weight, detected mass, ionization process ( $\text{H}^+$  as proton adduct;  $\text{NO}^+$  as  $\text{NO}^+$  adduct; CT as charge transfer), and behavior.

| Molecule                                |                           | $\text{H}_3\text{O}^+$ ionization mode |              |                   | $\text{NO}^+$ ionization mode |               |                   |
|-----------------------------------------|---------------------------|----------------------------------------|--------------|-------------------|-------------------------------|---------------|-------------------|
| Raw formula                             | M ( $\text{g mol}^{-1}$ ) | m/z                                    | Process      | Behavior          | m/z                           | Process       | Behavior          |
| <b><math>\alpha</math>-phellandrene</b> |                           |                                        |              |                   |                               |               |                   |
| $\text{C}_3\text{H}_6\text{O}$          | 58                        | 59.0383                                | $\text{H}^+$ | Primary-Secondary | 88.0268                       | $\text{NO}^+$ | Primary-Secondary |
| $\text{C}_3\text{H}_4\text{O}_2$        | 72                        | 73.0133                                | $\text{H}^+$ | Secondary         | 102.0035                      | $\text{NO}^+$ | Secondary         |
| $\text{C}_7\text{H}_{10}\text{O}_2$     | 126                       | 127.0457                               | $\text{H}^+$ | Secondary         | /                             | /             | /                 |
| $\text{C}_7\text{H}_{12}\text{O}_2$     | 128                       | 129.0452                               | $\text{H}^+$ | Secondary         | /                             | /             | /                 |
| $\text{C}_5\text{H}_{10}\text{O}_4$     | 134                       | /                                      | /            | /                 | 164.0281                      | $\text{NO}^+$ | Secondary         |
| $\text{C}_7\text{H}_{10}\text{O}_3$     | 142                       | /                                      | /            | /                 | 172.0275                      | CT            | Secondary         |
| $\text{C}_6\text{H}_{12}\text{O}_4$     | 148                       | 149.0441                               | $\text{H}^+$ | Secondary         | 148.0484                      | CT            | Secondary         |
| $\text{C}_{10}\text{H}_{16}\text{O}$    | 152                       | 153.0848                               | $\text{H}^+$ | Primary           | /                             | /             | /                 |
| $\text{C}_{10}\text{H}_{16}\text{O}_2$  | 168                       | 169.0742                               | $\text{H}^+$ | Primary           | 168.0816                      | CT            | Primary           |
| $\text{C}_{10}\text{H}_{16}\text{O}_3$  | 184                       | 185.0637                               | $\text{H}^+$ | Secondary         | /                             | /             | /                 |
| $\text{C}_{10}\text{H}_{15}\text{NO}_4$ | 213                       | 214.0419                               | $\text{H}^+$ | Primary           | 243.0469                      | $\text{NO}^+$ | Primary           |

|                                                 |     |          |                |           |          |                 |           |
|-------------------------------------------------|-----|----------|----------------|-----------|----------|-----------------|-----------|
| C <sub>10</sub> H <sub>15</sub> NO <sub>5</sub> | 229 | 230.0278 | H <sup>+</sup> | Primary   | 259.0345 | NO <sup>+</sup> | Primary   |
| C <sub>10</sub> H <sub>15</sub> NO <sub>6</sub> | 245 | /        | /              | /         | 245.0431 | CT              | Secondary |
| <b>β-phellandrene</b>                           |     |          |                |           |          |                 |           |
| C <sub>3</sub> H <sub>6</sub> O                 | 58  | 59.0365  | H <sup>+</sup> | Primary   | 88.0198  | NO <sup>+</sup> | Primary   |
| C <sub>7</sub> H <sub>12</sub> O <sub>2</sub>   | 128 | 129.0438 | H <sup>+</sup> | Secondary | 128.0340 | CT              | Secondary |
| C <sub>5</sub> H <sub>10</sub> O <sub>4</sub>   | 134 | /        | /              | /         | 164.0050 | NO <sup>+</sup> | Secondary |
| C <sub>3</sub> H <sub>3</sub> NO <sub>5</sub>   | 133 | /        | /              | /         | 163.9707 | NO <sup>+</sup> | Secondary |
| C <sub>9</sub> H <sub>14</sub> O                | 138 | 139.0622 | H <sup>+</sup> | Primary   | /        | /               | /         |
| C <sub>6</sub> H <sub>12</sub> O <sub>4</sub>   | 148 | 149.0394 | H <sup>+</sup> | Primary   | /        | /               | /         |
| C <sub>10</sub> H <sub>16</sub> O               | 152 | 153.0670 | H <sup>+</sup> | Primary   | /        | /               | /         |
| C <sub>10</sub> H <sub>16</sub> O <sub>2</sub>  | 168 | 169.0610 | H <sup>+</sup> | Primary   | 168.0551 | CT              | Primary   |
| C <sub>9</sub> H <sub>13</sub> O <sub>3</sub>   | 170 | 171.0396 | H <sup>+</sup> | Secondary | /        | /               | /         |
| C <sub>10</sub> H <sub>15</sub> NO <sub>4</sub> | 213 | 214.0263 | H <sup>+</sup> | Primary   | /        | /               | /         |
| C <sub>10</sub> H <sub>15</sub> NO <sub>5</sub> | 229 | 230.0278 | H <sup>+</sup> | Detected  | /        | /               | /         |

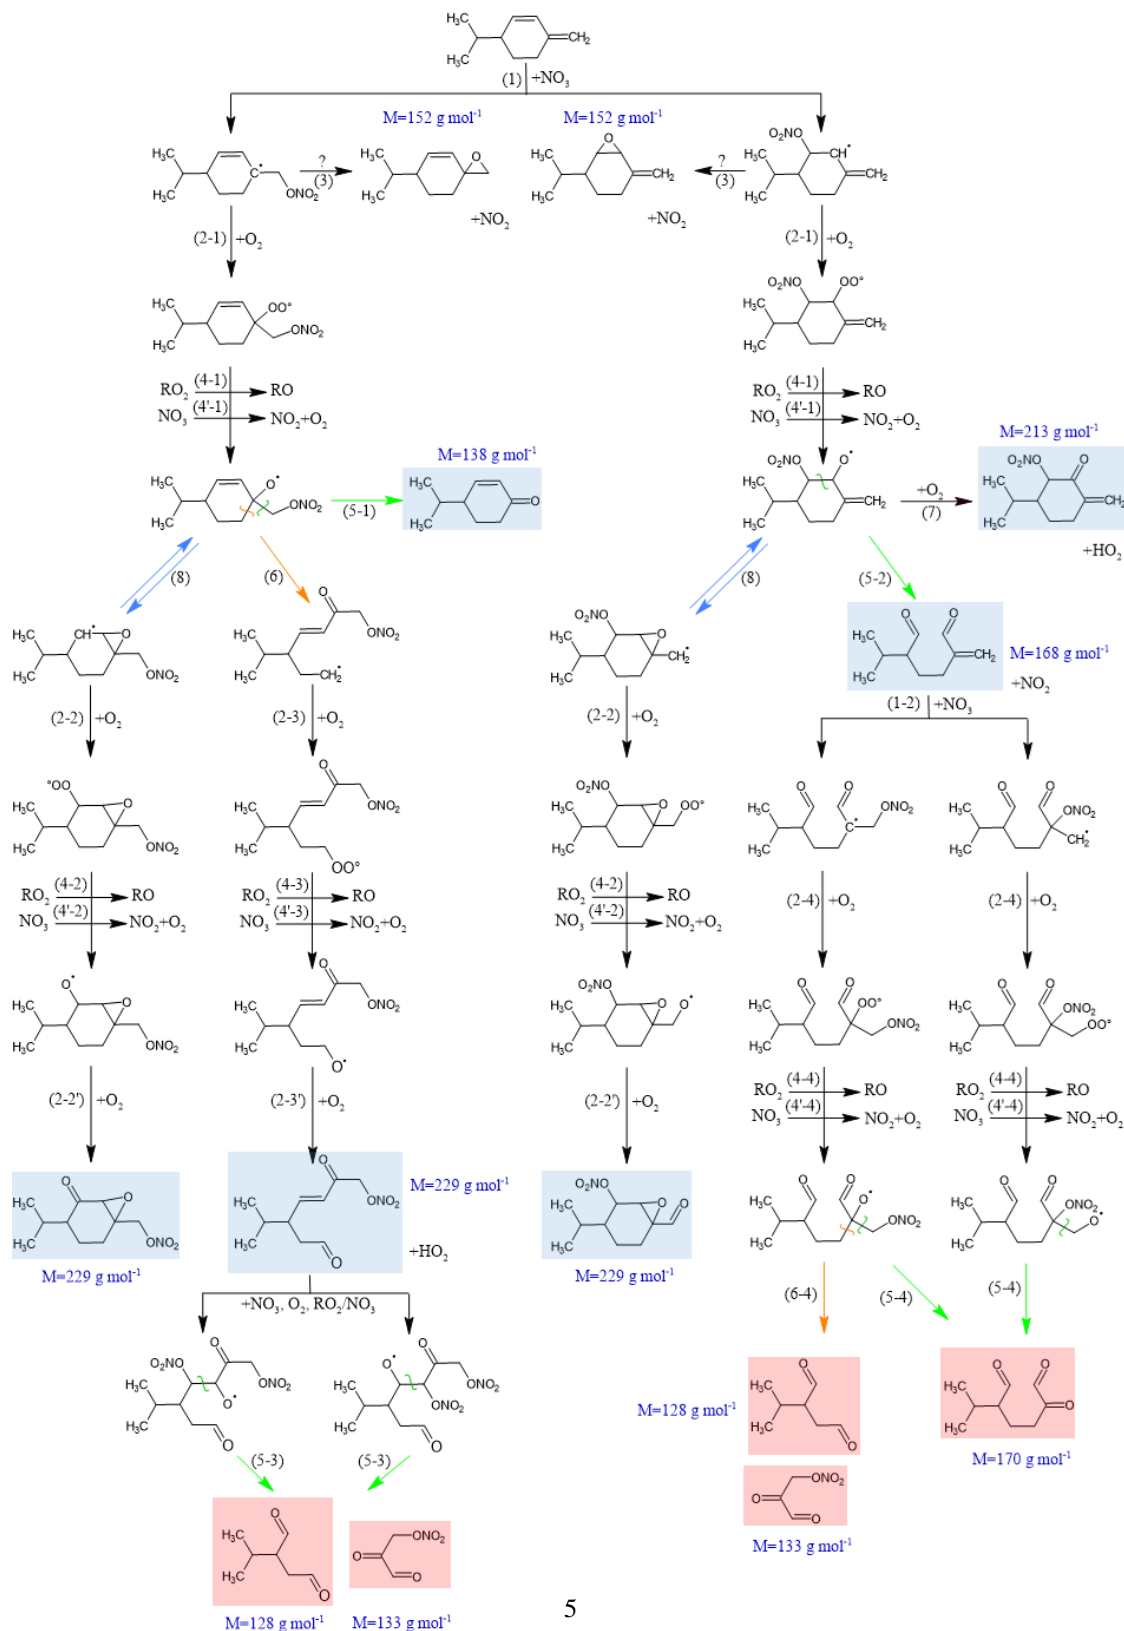

Figure S4: Mechanism proposed to explain the formation of first-generation products (colored in blue) and second-generation products (colored in red) detected by PTR-ToF-MS for the reaction of  $\beta$ -phellandrene+NO<sub>3</sub>.

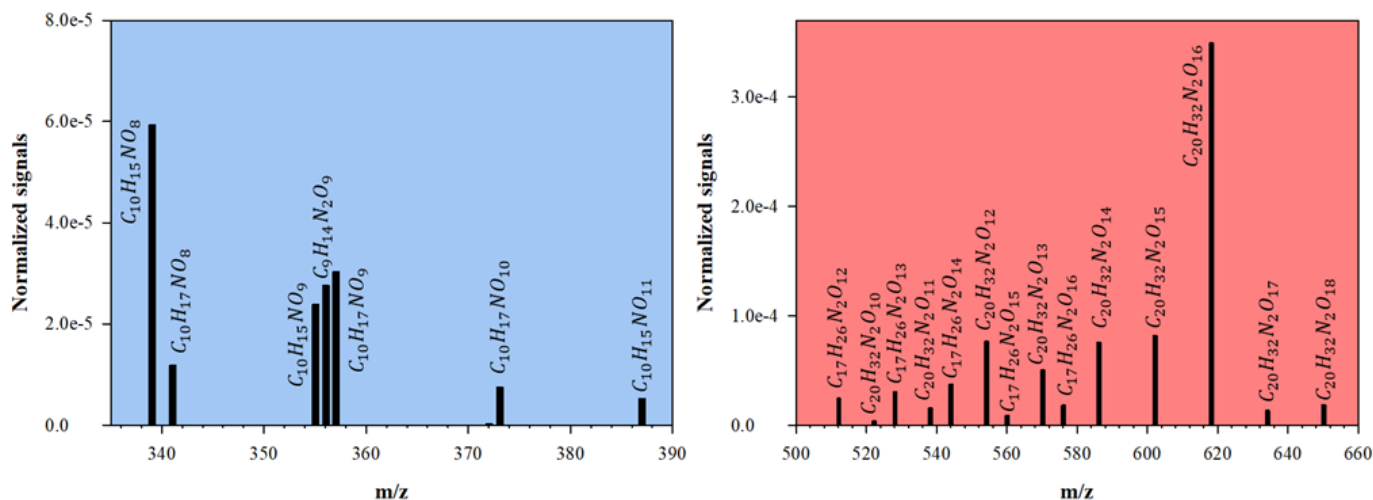

Figure S5: Average mass spectra of gas-phase HOMs for the NO<sub>3</sub>-oxidation of  $\alpha$ -phellandrene (average performed over 10 min following the start of the oxidation - Experiment 6). Labels display raw formulas of detected species, excluding the nitrate reagent ion cluster, but the  $m/z$  values (x-axis) include the nitrate mass (61.9883  $m/z$ ). Product signals are normalized to the reagent ion signals.

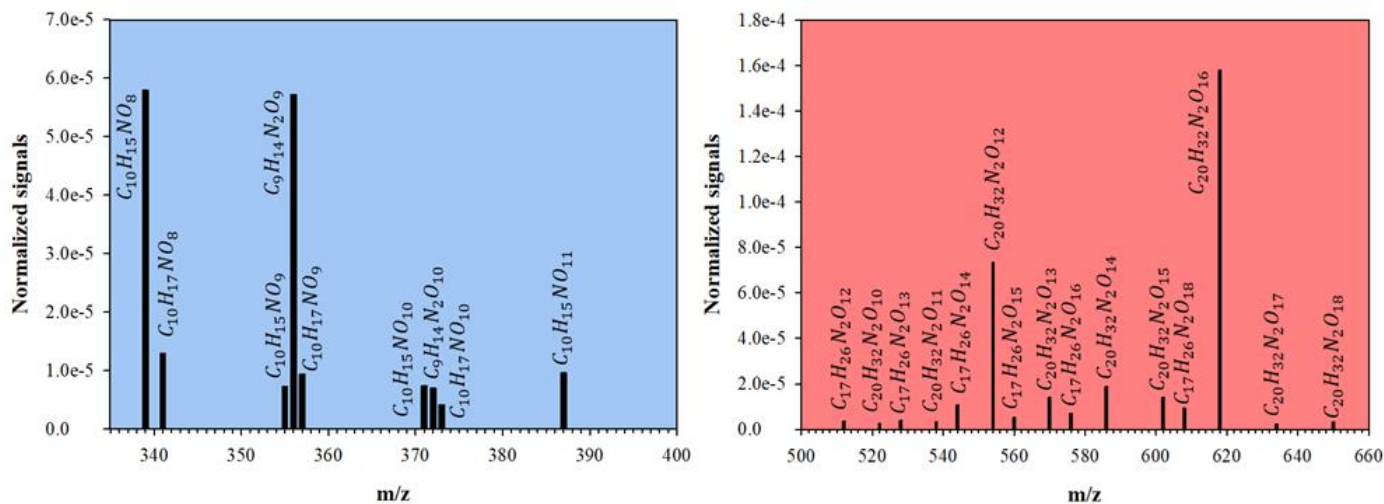

Figure S6: Average mass spectra measured of gas-phase HOMs for the NO<sub>3</sub>-oxidation of  $\beta$ -phellandrene (average performed over 10 min following the start of the oxidation - Experiment 11). Labels display raw formulas of detected species, excluding the nitrate reagent ion cluster, but the  $m/z$  values (x-axis) include the nitrate mass (61.9883  $m/z$ ). Product signals are normalized to the reagent ion signals.

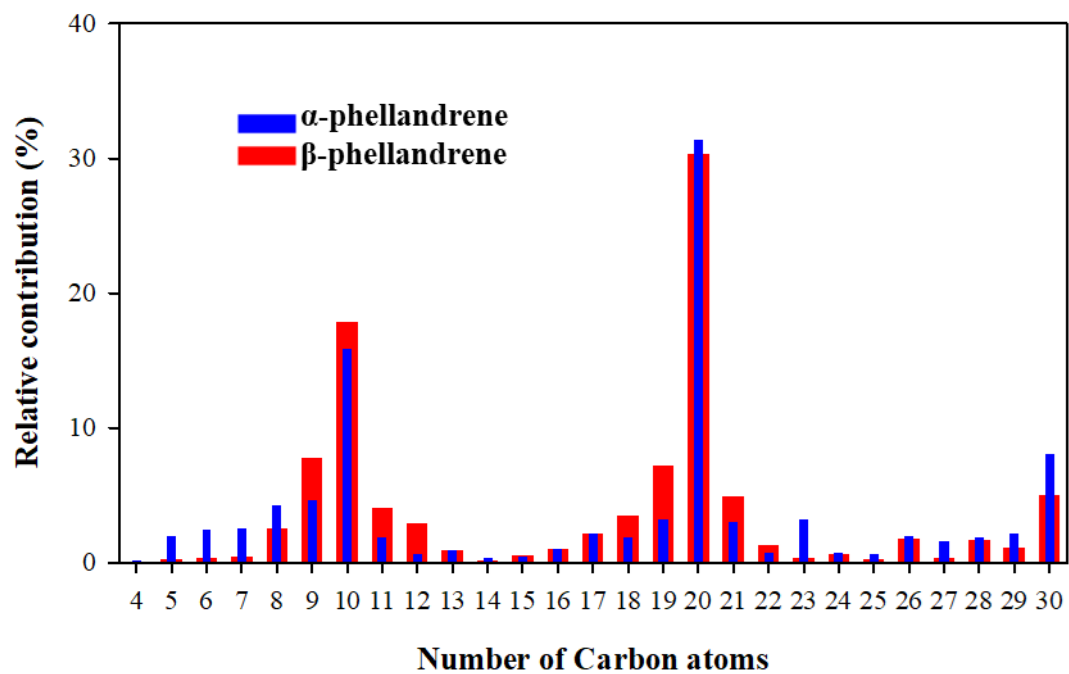

30

Figure S7. Distribution of the products detected in the aerosol phase as a function of the number of carbon atoms, for  $\alpha$ - and  $\beta$ -phellandrenes.
